# Supplementary material for: Neuroendocrine tumors in Panama: A nationwide database analysis
Source: PubMed Central journal article supplement (PMC8220651; doi:10.3892/mco.2021.2319), 2021-06-11
Supplement: Supplementary_Data.pdf [file Supplementary_Data.pdf]

Table SI. Primary tumor site and grading.

| Anatomical site      | n   | %     | G1 | G2 | G3 | Grading not specified |
|----------------------|-----|-------|----|----|----|-----------------------|
| Colorectal           | 27  | 17.20 | 8  | 8  | 11 | 0                     |
| Pancreas             | 20  | 12.74 | 11 | 7  | 1  | 1                     |
| Stomach              | 19  | 12.10 | 10 | 2  | 7  | 0                     |
| Jejunum-Ileum        | 14  | 8.92  | 12 | 1  | 0  | 1                     |
| Lungs                | 12  | 7.64  | 4  | 0  | 5  | 3                     |
| Appendix             | 11  | 7.01  | 7  | 1  | 3  | 0                     |
| Unknown primary site | 18  | 11.46 | 4  | 4  | 7  | 1                     |
| Breast               | 9   | 5.73  | 6  | 2  | 0  | 1                     |
| Duodenum             | 5   | 3.18  | 1  | 2  | 2  | 0                     |
| Ovaries              | 4   | 2.55  | 2  | 2  | 0  | 0                     |
| Skin                 | 3   | 1.91  | 0  | 0  | 3  | 0                     |
| Others               | 15  | 9.55  | 6  | 2  | 6  | 1                     |
| Total                | 157 | 100   | 71 | 31 | 45 | 8                     |

Cases where the primary tumor site were not determined or not identified were grouped as unknown. n: Occurrence; G1, G2, G3: Tumor grading.
